# Supplementary material for: A novel anti-HER2 anthracycline-based antibody-drug conjugate induces adaptive anti-tumor immunity and potentiates PD-1 blockade in breast cancer
Source: PubMed Central journal article supplement (PMC6341578; doi:10.1186/s40425-018-0464-1), 2019-01-21
Supplement: 40425_2018_464_MOESM1_ESM.pdf [file 40425_2018_464_MOESM1_ESM.pdf]

## Supplementary Material

### Supplementary Figure 1.

Generation of a murine EMT6-hHER2 breast cancer cell line. **A**, Human-HER2 expression in EMT6-hHER2 or EMT6-WT tumor cell line determined by FACS. **B**, H&E (top panel) and  $\alpha$ -hHER2 (bottom panel) immunohistochemical staining of orthotopic EMT6-WT and EMT6-hHER2 tumors. Images were acquired at 400X magnification. **C**, Cell proliferation assay showing EMT6-WT and EMT6-hHER2 growth inhibition after T-PNU or T-DM1 treatment *in vitro*.

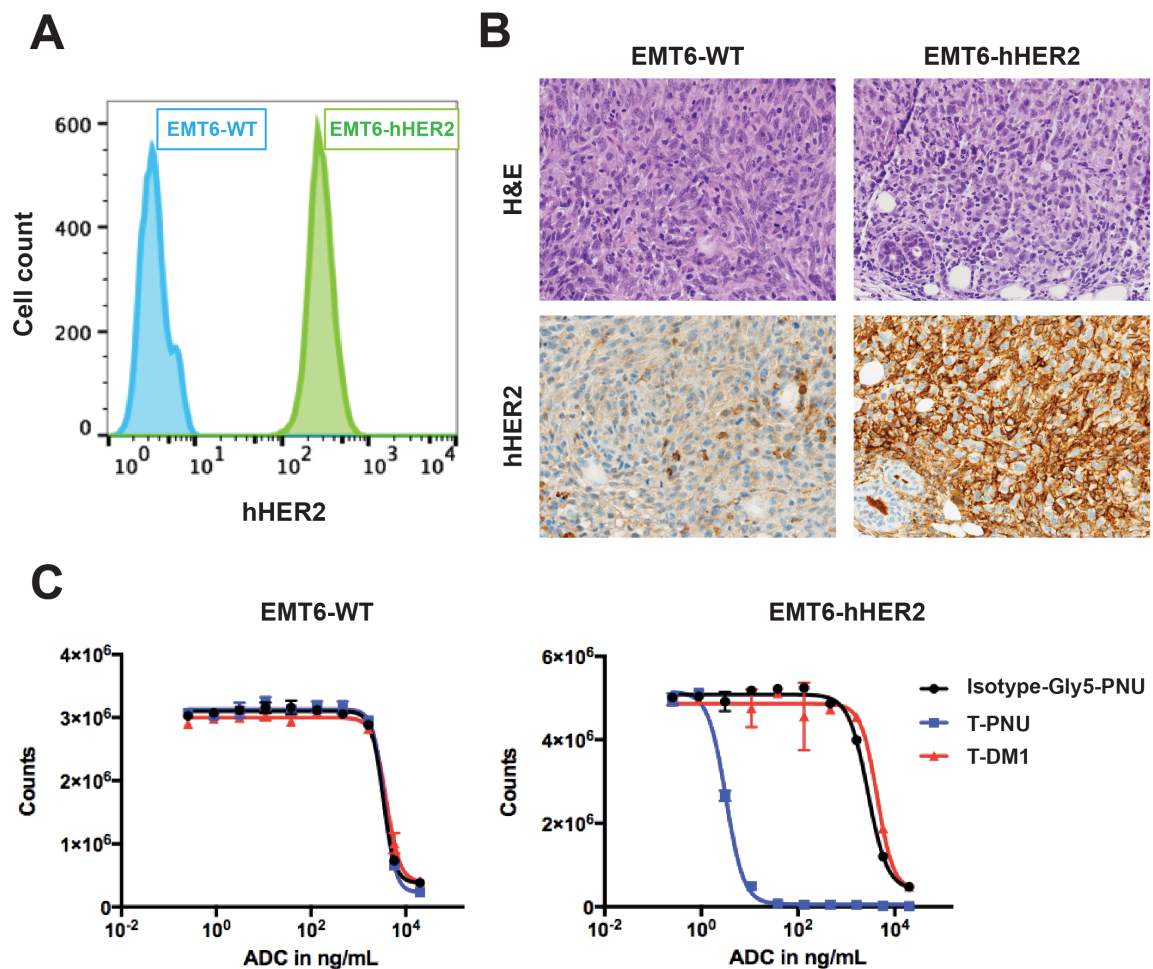

## Supplementary Figure 2.

Trastuzumab, free PNU or mitoxantrone treatment is ineffective in promoting EMT6-hHER2 tumor growth inhibition. **A**, Therapeutic response of EMT6-hHER2 tumors exposed to T-PNU (1 mg/kg, 2x), free PNU (6 and 8  $\mu$ g/kg, 2x), trastuzumab (20 mg/kg, 4x, once per week) and mitoxantrone (4 mg/kg 1x). One representative experiment is shown (n=number of cured mice out of treated animals as indicated). **B**, Survival curves of **A**.

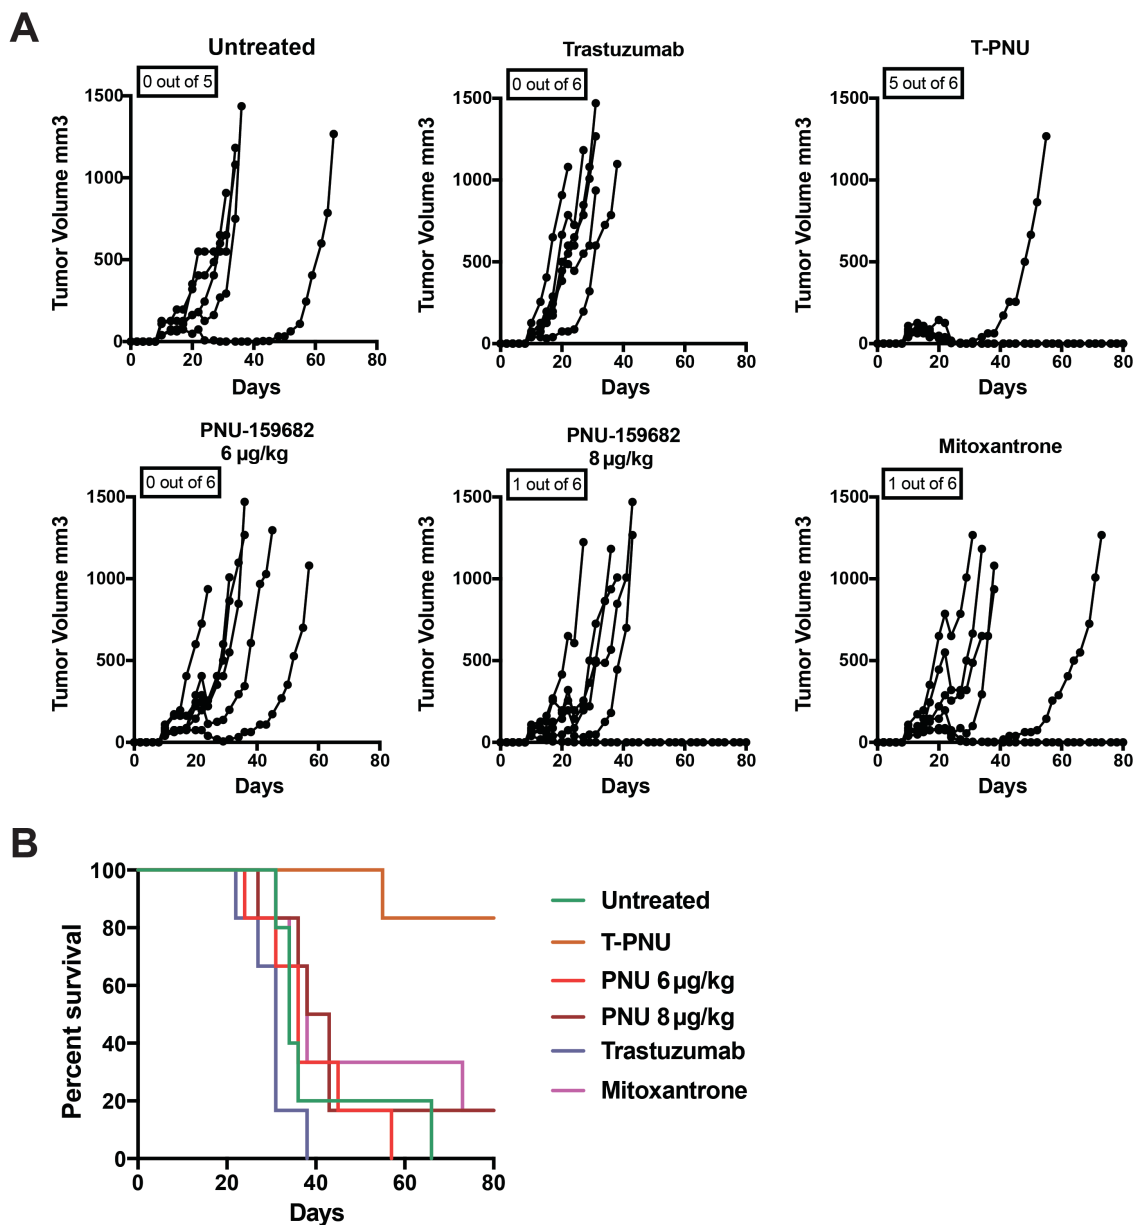

### Supplementary Figure 3.

T-PNU samples cluster apart from untreated, trastuzumab and T-DM1 treated samples based on gene expression. **A**, Sample similarity in a 2D projection by multi-dimensional scaling. Only the top 1,000 differentially expressed genes (DEGs) are taken into account. **B**, Heatmap of the gene expression vs sample matrix. Displayed are custom selected genes plus the top 1,000 DEGs (rows) of all samples (columns).

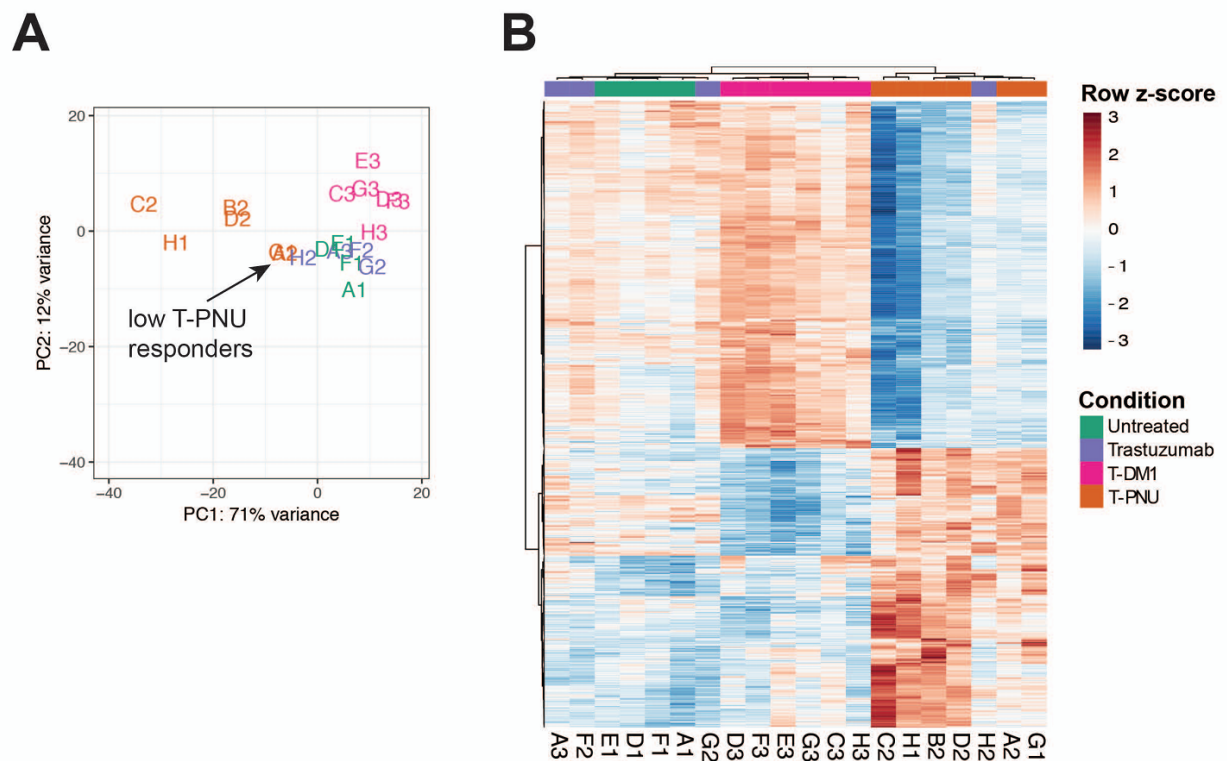

### Supplementary Figure 4.

Heatmap PID CD8 TCR downstream pathway.

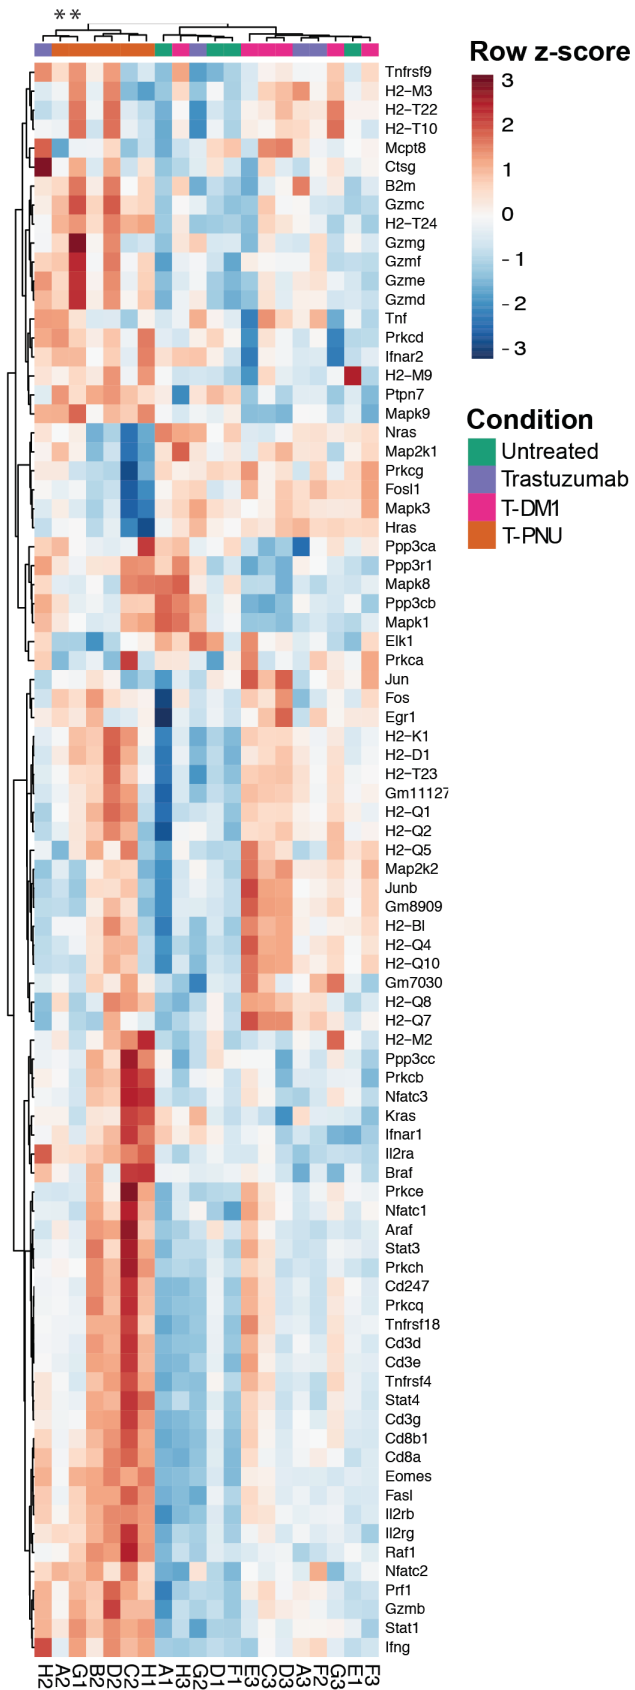



### Supplementary Figure 5.

Gene signatures of innate immune and cytokine pathways. **A**, Network cluster of gene sets with overlapping genes with shared function of inflammatory pathway. The network includes 36 gene sets and 7,551 genes (see Supplementary Table S2). **B-D**, Heatmaps of BIOCARTE inflammatory, dendritic cell (DC) and cytokine pathway, respectively. Asterisks denote low-responding T-PNU samples.

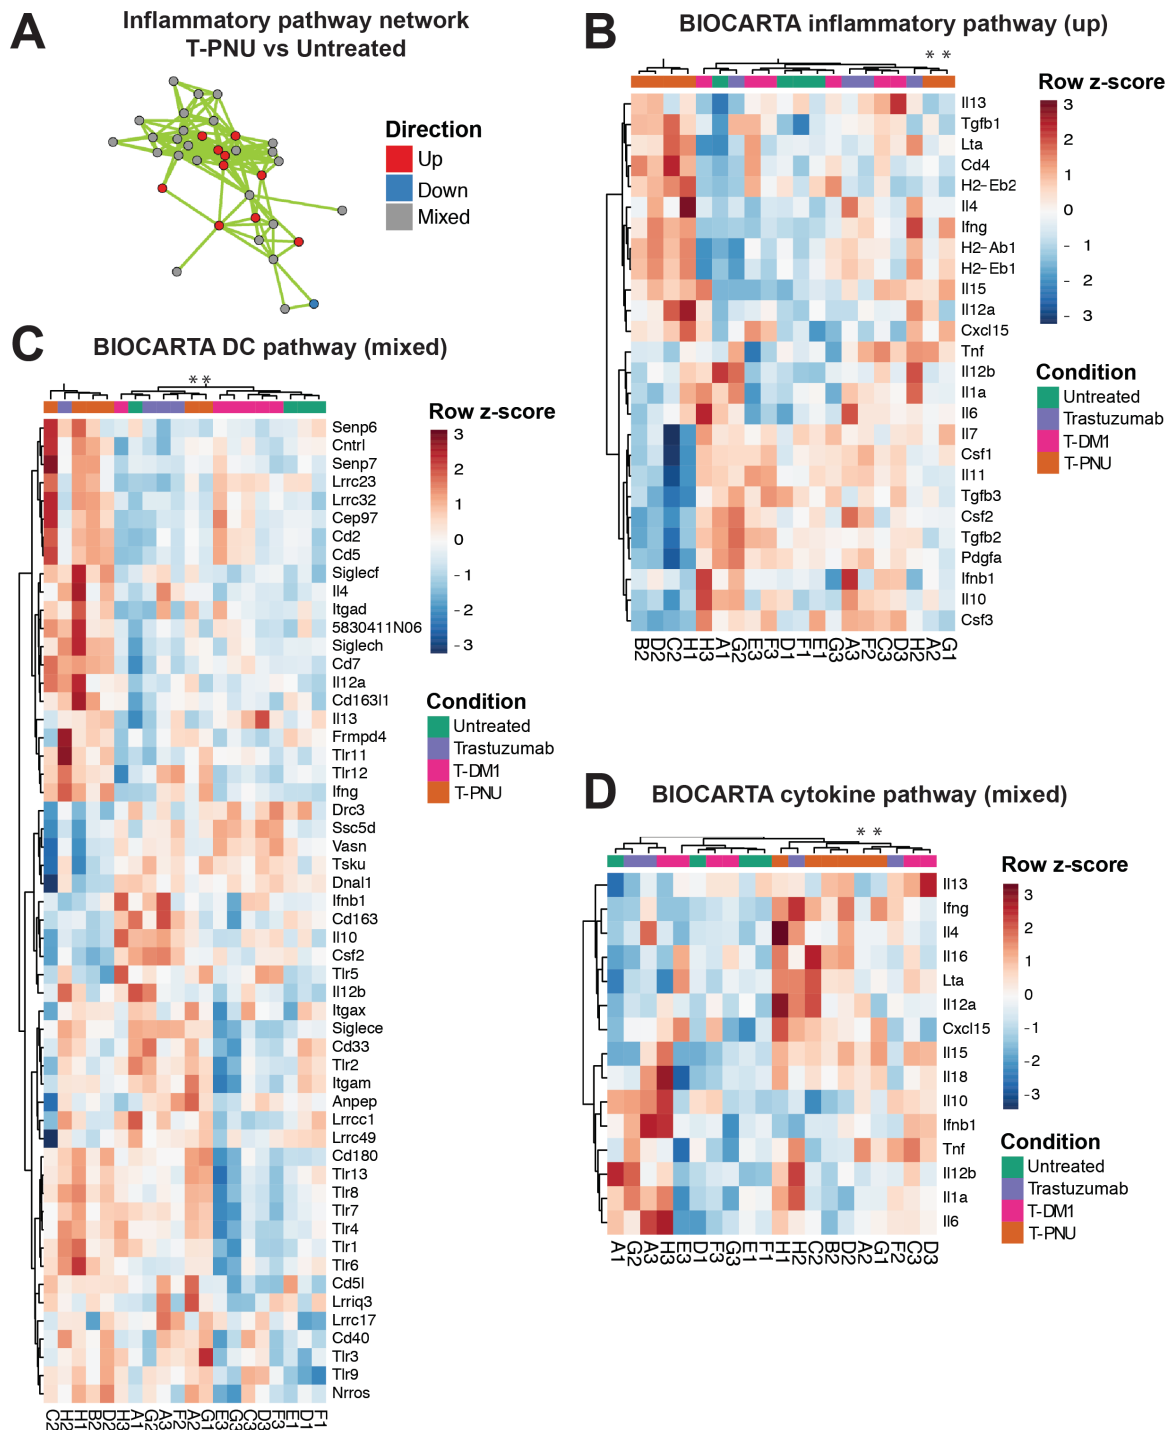

## Supplementary Figure 6.

Characterization of intratumoral T cells upon treatment. \* $p \leq 0.05$ , \*\* $p \leq 0.01$ . **A**, MvA plot depicting expression and effect size of selected key immune genes. For each comparison, the fold-change is set in relation to the average expression of each gene. The labels indicate genes of interest. **B**, Validation by FACS of selected CD8 T cell markers of functional activation and proliferation identified in **A** in between the comparisons.

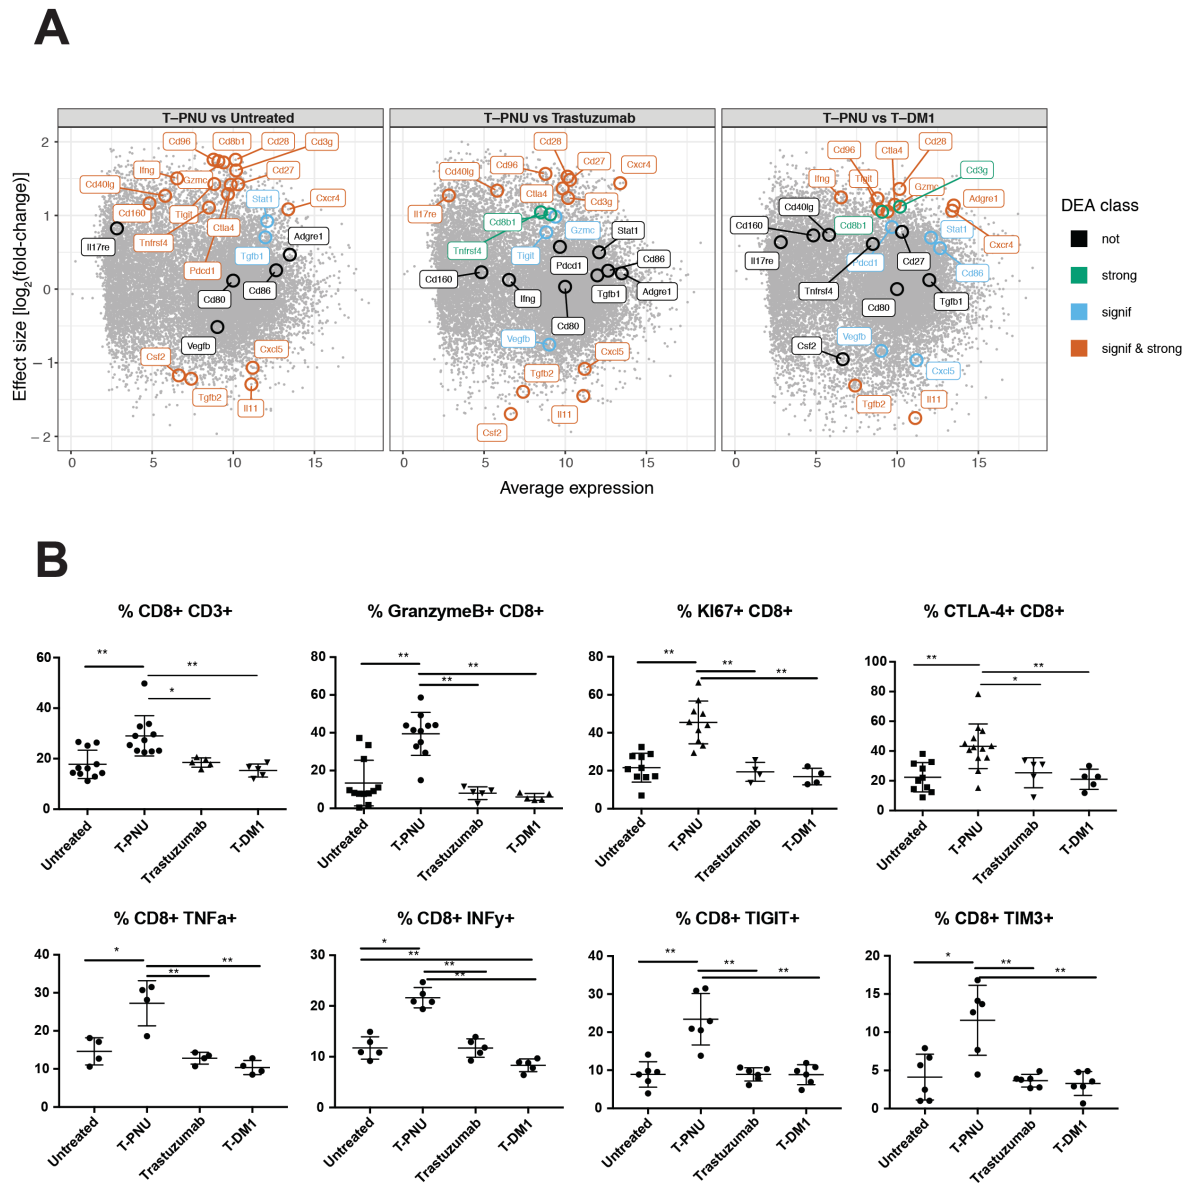

**Supplementary Table 1.**  
Gene sets of network TCR pathway.

| Name                                                      | NGenes | Direction | FDR.Mixed |
|-----------------------------------------------------------|--------|-----------|-----------|
| BIOCARTA TCRA PATHWAY                                     | 36     | Up        | 1.4E-05   |
| REACTOME COSTIMULATION BY THE CD28 FAMILY                 | 126    | Mixed     | 2.5E-05   |
| REACTOME CD28 CO STIMULATION                              | 69     | Mixed     | 3.5E-05   |
| REACTOME CD28 DEPENDENT VAV1 PATHWAY                      | 39     | Mixed     | 1.2E-04   |
| BIOCARTA CTLA4 PATHWAY                                    | 39     | Mixed     | 5.2E-04   |
| REACTOME CD28 DEPENDENT PI3K AKT SIGNALING                | 54     | Mixed     | 5.3E-05   |
| REACTOME REGULATION OF SIGNALING BY CBL                   | 39     | Mixed     | 2.3E-04   |
| REACTOME TCR SIGNALING                                    | 105    | Up        | 8.9E-06   |
| REACTOME DOWNSTREAM TCR SIGNALING                         | 69     | Up        | 8.4E-06   |
| REACTOME PHOSPHORYLATION OF CD3 AND TCR ZETA CHAINS       | 30     | Mixed     | 7.0E-07   |
| REACTOME PECAM1 INTERACTIONS                              | 39     | Mixed     | 4.4E-04   |
| REACTOME TRANSLOCATION OF ZAP 70 TO IMMUNOLOGICAL SYNAPSE | 27     | Up        | 8.0E-07   |
| REACTOME GENERATION OF SECOND MESSENGER MOLECULES         | 48     | Up        | 1.5E-06   |
| REACTOME PD1 SIGNALING                                    | 36     | Up        | 8.0E-07   |
| BIOCARTA CDC42RAC PATHWAY                                 | 39     | Down      | 1.4E-05   |
| PID EPHA2 FWD PATHWAY                                     | 60     | Mixed     | 4.4E-06   |
| BIOCARTA IL7 PATHWAY                                      | 45     | Mixed     | 3.1E-04   |
| PID ECADHERIN KERATINOCYTE PATHWAY                        | 57     | Mixed     | 1.6E-04   |
| PID EPHRINB REV PATHWAY                                   | 75     | Up        | 3.6E-05   |
| REACTOME CTLA4 INHIBITORY SIGNALING                       | 57     | Mixed     | 1.4E-04   |
| PID NFKAPPAB ATYPICAL PATHWAY                             | 51     | Mixed     | 4.3E-05   |
| PID NETRIN PATHWAY                                        | 81     | Mixed     | 7.0E-06   |
| PID EPHA FWDPATHWAY                                       | 75     | Up        | 6.3E-05   |
| REACTOME REGULATION OF KIT SIGNALING                      | 36     | Mixed     | 1.5E-03   |
| BIOCARTA EPHA4 PATHWAY                                    | 33     | Mixed     | 2.1E-05   |
| REACTOME DCC MEDIATED ATTRACTIVE SIGNALING                | 33     | Mixed     | 4.8E-05   |
| PID NEPHRIN NEPH1 PATHWAY                                 | 57     | Mixed     | 7.7E-05   |
| PID SYNDECAN 2 PATHWAY                                    | 114    | Mixed     | 2.5E-05   |
| BIOCARTA TCAPOPTOSIS PATHWAY                              | 18     | Up        | 9.0E-07   |
| BIOCARTA SALMONELLA PATHWAY                               | 27     | Down      | 4.4E-05   |
| BIOCARTA ACTINY PATHWAY                                   | 39     | Down      | 4.1E-06   |
| PID NECTIN PATHWAY                                        | 84     | Mixed     | 6.4E-05   |
| PID P38 ALPHA BETA PATHWAY                                | 66     | Mixed     | 3.4E-05   |
| PID CDC42 PATHWAY                                         | 171    | Mixed     | 1.0E-04   |
| PID ARF6 PATHWAY                                          | 87     | Mixed     | 1.1E-04   |
| PID ECADHERIN NASCENT AJ PATHWAY                          | 117    | Mixed     | 6.5E-05   |
| REACTOME NETRIN1 SIGNALING                                | 57     | Mixed     | 5.8E-05   |
| BIOCARTA CBL PATHWAY                                      | 30     | Mixed     | 1.1E-03   |
| BIOCARTA RAC1 PATHWAY                                     | 54     | Down      | 3.0E-06   |
| BIOCARTA RHO PATHWAY                                      | 81     | Mixed     | 6.6E-05   |
| PID ECADHERIN STABILIZATION PATHWAY                       | 105    | Mixed     | 1.5E-04   |
| PID NCADHERIN PATHWAY                                     | 102    | Mixed     | 6.0E-05   |
| PID RAC1 PATHWAY                                          | 129    | Down      | 1.3E-05   |
| REACTOME DSCAM INTERACTIONS                               | 24     | Down      | 6.1E-05   |

## Supplementary Table 2.

### Gene sets of network activated TLR pathway.

| Name                                                                                              | NGenes | Direction | FDR.Mixed |
|---------------------------------------------------------------------------------------------------|--------|-----------|-----------|
| BIOCARTA NFKB PATHWAY                                                                             | 57     | Mixed     | 8.9E-05   |
| BIOCARTA TOLL PATHWAY                                                                             | 84     | Mixed     | 4.8E-05   |
| REACTOME TAK1 ACTIVATES NFKB BY PHOSPHORYLATION AND ACTIVATION OF IKKS COMPLEX                    | 39     | Mixed     | 3.2E-05   |
| REACTOME TRIF MEDIATED TLR3 SIGNALING                                                             | 147    | Up        | 3.9E-05   |
| REACTOME NFKB AND MAP KINASES ACTIVATION MEDIATED BY TLR4 SIGNALING REPERTOIRE                    | 135    | Up        | 2.9E-05   |
| REACTOME MYD88 MAL CASCADE INITIATED ON PLASMA MEMBRANE                                           | 156    | Up        | 2.8E-05   |
| REACTOME ACTIVATED TLR4 SIGNALLING                                                                | 171    | Mixed     | 3.8E-05   |
| BIOCARTA IL1R PATHWAY                                                                             | 81     | Mixed     | 3.5E-05   |
| BIOCARTA NTHI PATHWAY                                                                             | 63     | Mixed     | 3.0E-05   |
| BIOCARTA STRESS PATHWAY                                                                           | 63     | Down      | 1.5E-04   |
| REACTOME TRAF6 MEDIATED INDUCTION OF NFKB AND MAP KINASES UPON TLR7 8 OR 9 ACTIVATION             | 156    | Mixed     | 2.7E-05   |
| KEGG TOLL LIKE RECEPTOR SIGNALING PATHWAY                                                         | 177    | Mixed     | 1.7E-05   |
| BIOCARTA RELA PATHWAY                                                                             | 42     | Mixed     | 7.3E-05   |
| REACTOME RIP MEDIATED NFKB ACTIVATION VIA DAI                                                     | 36     | Mixed     | 1.0E-04   |
| BIOCARTA CD40 PATHWAY                                                                             | 48     | Mixed     | 8.7E-05   |
| BIOCARTA TNFR2 PATHWAY                                                                            | 57     | Mixed     | 7.3E-05   |
| PID TOLL ENDOGENOUS PATHWAY                                                                       | 27     | Down      | 6.3E-04   |
| REACTOME MAP KINASE ACTIVATION IN TLR CASCADE                                                     | 99     | Up        | 2.4E-05   |
| REACTOME TRAF6 MEDIATED NFKB ACTIVATION                                                           | 45     | Mixed     | 1.9E-04   |
| BIOCARTA 41BB PATHWAY                                                                             | 39     | Mixed     | 4.9E-05   |
| REACTOME MAPK TARGETS NUCLEAR EVENTS MEDIATED BY MAP KINASES                                      | 66     | Mixed     | 3.8E-05   |
| REACTOME TRAF6 MEDIATED IRF7 ACTIVATION                                                           | 33     | Mixed     | 4.2E-04   |
| REACTOME TRAF6 MEDIATED IRF7 ACTIVATION IN TLR7 8 OR 9 SIGNALING                                  | 21     | Mixed     | 1.0E-04   |
| REACTOME TRAF6 MEDIATED INDUCTION OF TAK1 COMPLEX                                                 | 21     | Up        | 5.6E-03   |
| BIOCARTA RNA PATHWAY                                                                              | 36     | Mixed     | 4.9E-05   |
| BIOCARTA TALL1 PATHWAY                                                                            | 42     | Mixed     | 1.9E-04   |
| REACTOME NUCLEAR EVENTS KINASE AND TRANSCRIPTION FACTOR ACTIVATION                                | 54     | Mixed     | 2.8E-05   |
| REACTOME ERK MAPK TARGETS                                                                         | 45     | Mixed     | 1.0E-05   |
| REACTOME IL1 SIGNALING                                                                            | 81     | Mixed     | 7.4E-06   |
| KEGG RIG I LIKE RECEPTOR SIGNALING PATHWAY                                                        | 93     | Mixed     | 1.4E-04   |
| BIOCARTA DC PATHWAY                                                                               | 57     | Mixed     | 6.1E-05   |
| PID NFKAPPAB CANONICAL PATHWAY                                                                    | 45     | Up        | 3.6E-04   |
| REACTOME ACTIVATION OF IRF3 IRF7 MEDIATED BY TBK1 IKK EPSILON                                     | 21     | Mixed     | 6.5E-04   |
| BIOCARTA CYTOKINE PATHWAY                                                                         | 30     | Mixed     | 2.7E-04   |
| REACTOME NOD1 2 SIGNALING PATHWAY                                                                 | 48     | Mixed     | 4.8E-05   |
| REACTOME NUCLEOTIDE BINDING DOMAIN LEUCINE RICH REPEAT CONTAINING RECEPTOR NLR SIGNALING PATHWAYS | 69     | Mixed     | 3.1E-05   |
| KEGG CYTOSOLIC DNA SENSING PATHWAY                                                                | 81     | Up        | 1.1E-04   |
| BIOCARTA INFLAM PATHWAY                                                                           | 48     | Up        | 1.3E-05   |
| PID CD40 PATHWAY                                                                                  | 81     | Mixed     | 3.3E-05   |
| REACTOME TRAFFICKING AND PROCESSING OF ENDOSOMAL TLR                                              | 39     | Mixed     | 5.7E-05   |
| REACTOME ERKS ARE INACTIVATED                                                                     | 27     | Up        | 1.1E-06   |
| REACTOME ACTIVATED TAK1 MEDIATES P38 MAPK ACTIVATION                                              | 24     | Mixed     | 2.2E-04   |
| PID IL1 PATHWAY                                                                                   | 84     | Up        | 2.3E-05   |
| PID TNF PATHWAY                                                                                   | 111    | Mixed     | 1.1E-05   |
| REACTOME JNK C JUN KINASES PHOSPHORYLATION AND ACTIVATION MEDIATED BY ACTIVATED HUMAN TAK1        | 24     | Up        | 3.6E-04   |
| KEGG NOD LIKE RECEPTOR SIGNALING PATHWAY                                                          | 102    | Up        | 1.3E-04   |
| KEGG PATHOGENIC ESCHERICHIA COLI INFECTION                                                        | 111    | Mixed     | 5.6E-05   |
| KEGG LEISHMANIA INFECTION                                                                         | 138    | Mixed     | 2.1E-05   |
| REACTOME REGULATION OF IFNA SIGNALING                                                             | 27     | Mixed     | 1.9E-05   |
| REACTOME RIG I MDA5 MEDIATED INDUCTION OF IFN ALPHA BETA PATHWAYS                                 | 99     | Mixed     | 2.2E-04   |
| BIOCARTA TID PATHWAY                                                                              | 63     | Up        | 8.7E-05   |
| BIOCARTA GSK3 PATHWAY                                                                             | 75     | Mixed     | 1.5E-05   |
| REACTOME PLATELET SENSITIZATION BY LDL                                                            | 42     | Mixed     | 1.3E-04   |
| REACTOME TRAF3 DEPENDENT IRF ACTIVATION PATHWAY                                                   | 27     | Mixed     | 2.0E-04   |
| REACTOME NFKB ACTIVATION THROUGH FADD RIP1 PATHWAY MEDIATED BY CASPASE 8 AND10                    | 21     | Mixed     | 7.9E-04   |
| BIOCARTA ATM PATHWAY                                                                              | 57     | Mixed     | 1.6E-04   |
| BIOCARTA RANKL PATHWAY                                                                            | 48     | Mixed     | 5.8E-05   |
| BIOCARTA EPONFKB PATHWAY                                                                          | 45     | Up        | 2.2E-05   |
| BIOCARTA ARENRF2 PATHWAY                                                                          | 18     | Mixed     | 7.0E-04   |
| BIOCARTA STEM PATHWAY                                                                             | 18     | Up        | 2.5E-05   |
| REACTOME CTNNB1 PHOSPHORYLATION CASCADE                                                           | 36     | Mixed     | 4.7E-05   |
| REACTOME ADVANCED GLYCOSYLATION ENDPRODUCT RECEPTOR SIGNALING                                     | 15     | Mixed     | 8.3E-04   |
| REACTOME THE NLRP3 INFLAMMASOME                                                                   | 21     | Mixed     | 5.0E-05   |
| REACTOME INFLAMMASOMES                                                                            | 24     | Mixed     | 3.5E-05   |
| BIOCARTA ERYTH PATHWAY                                                                            | 27     | Up        | 3.0E-04   |
| PID TCR JNK PATHWAY                                                                               | 27     | Mixed     | 6.1E-05   |
| REACTOME IRAK1 RECRUITS IKK COMPLEX                                                               | 18     | Mixed     | 2.9E-03   |
